# Supplementary material for: Graphene quantum dots/gold electrode and its application in living cell H2O2 detection
Source: Royal Society of Chemistry journal article supplement (doi:10.1039/c3nr33954h), 2013-01-01
Supplement: c3nr33954h.pdf [file c3nr33954h.pdf]

# Graphene Quantum Dots/Gold Electrode and Its Application in Living Cells H<sub>2</sub>O<sub>2</sub> Detection

Yan Zhang<sup>a</sup>, Congyu Wu<sup>a</sup>, Xuejiao Zhou<sup>a</sup>, Xiaochen Wu<sup>a</sup>, Yongqiang Yang<sup>a</sup>, Haixia Wu<sup>a</sup>, Jingyan Zhang<sup>b\*</sup> and Shouwu Guo<sup>a\*</sup>

## Methods

### *Materials*

Graphite (crystalline powders, ~ 500 meshes) was purchased from Shanghai Yifan Graphite Co., Ltd., Shanghai, China. 3, 3', 5, 5'-Tetramethylbenzidine (TMB), KCl, KH<sub>2</sub>PO<sub>4</sub>, K<sub>2</sub>HPO<sub>4</sub>, NaAc, HAc, and 30% H<sub>2</sub>O<sub>2</sub> were obtained from Sinopharm Chemical Reagent Co., Ltd., Shanghai, China. Concentrated H<sub>2</sub>SO<sub>4</sub> was acquired from Shanghai Lingfeng Chemical Reagent Co., Ltd., Shanghai, China. Cysteamine was acquired from Aladdin Chemistry Co., Ltd., Shanghai, China. N-(3-Dimethylaminopropyl)-N'-ethylcarbodiimide hydrochloride (EDC) were obtained from Sigma-aldrich Co., Ltd. N-Hydroxysuccinimide (NHS) was purchased from Thermo Scientific Co., Ltd. Phorbol-12-myristate-13-acetate (PMA) was purchased from Beyotime Institute of Biotechnology Co., Ltd., Shanghai, China. All of the reagents were used as received.

### *1.1 Preparation of graphene quantum dots*

GO and GQDs were generated as described in our previous work.<sup>26</sup> In a typical experiment, 20 mL, 1 mg/mL GO aqueous suspension and 1 mL, 30% H<sub>2</sub>O<sub>2</sub> were mixed in a quartz tube under vigorous stirring. The reaction was initiated by exposing the quartz tube to a mercury lamp (365 nm, 1000 W). The reaction products were dialyzed in ultra-pure water for two days to remove the trace H<sub>2</sub>O<sub>2</sub>, and other small molecular reaction products.

## 1.2 Instrumentations

Atomic Force Microscope (AFM) images were acquired using a Multimode Nanoscope V scanning probe microscopy system (Bruker, USA). The specimen was prepared by casting the aqueous suspensions of GQDs on freshly cleaved mica surface and dried in air. Scanning electron microscopic (SEM) images of modified GC electrode were acquired on an Ultra 55 field emission scanning electron microscopy (Zeiss, Germany) with 5 kV of acceleration voltage. UV-visible absorption spectra were recorded on a Shimadzu UV-2550 (Shimadzu, Japan).

## 1.3 Peroxidase activity assay

The peroxidase activity assays were carried out by monitoring the absorbance change at 652 nm for 5 min on UV-visible spectrophotometer. In a typical experiment, 40  $\mu\text{g}$  GQDs in 1 mL NaAc buffer solution (0.1 M, pH 3.5) were mixed with 0.9 mM TMB and 50 mM  $\text{H}_2\text{O}_2$ .

## 1.4 Modification of Au electrode by GQDs

To modify the Au electrode, the cysteamine monolayer was assembled on the Au electrode's surface first. The bare Au electrode was polished to a mirrorlike surface with 1.0, 0.3, and 0.05  $\mu\text{m}$   $\alpha$ -alumina and immersed in piranha solution (a hot solution of 1:3 vol/ vol 30%  $\text{H}_2\text{O}_2$ /conc.  $\text{H}_2\text{SO}_4$ ) for 1 min. The Au substrate was then subjected to mass water washing and ultrasonical cleaning using water and methanol successively. The cysteamine monolayer was prepared by dipping the clean Au electrode upright into 0.05 M cysteamine solutions for 4 h at 25  $^\circ\text{C}$ . Then the electrode was rinsed with water and dried with a stream of  $\text{N}_2$ . At the same time, 0.4 mg GQDs were dispersed in 1 mL water with 3.6 mg EDC and 1.0 mg NHS to convert the carboxyl groups into active carbodiimide esters. The cysteamine modified gold electrode was dipped upright into the GQDs solution for 12 h and then rinsing with water and drying in a stream of  $\text{N}_2$ .

## 1.5 Electrochemical measurements

The electrochemical measurements were performed on a CHI 660C electrochemical workstation (Chen Hua Co., China) using a three electrode system, with a bare Au or the modified Au electrode as a working electrode, platinum wire as a counter

electrode, and a saturated calomel electrode as reference electrode. The electrolyte solution purged with pure N<sub>2</sub> for 15 min to remove oxygen before the electrochemical measurement.

#### *1.6 Detection of H<sub>2</sub>O<sub>2</sub> in living cells*

Human breast cancer MCF-7 cells were obtained from Cell Bank (Shanghai Institute of Biochemistry and Cell Biology, Chinese Academy of Sciences). The cells were maintained in a culture medium consisting of RPMI-1640 medium supplemented with 10% FBS and 100 U mL<sup>-1</sup> penicillin-streptomycin (37 °C, 5% CO<sub>2</sub>). The MCF-7 cells were centrifuged to obtain a cell-packed pellet (~ 1.3×10<sup>6</sup> cells) for the electrochemical experiments.

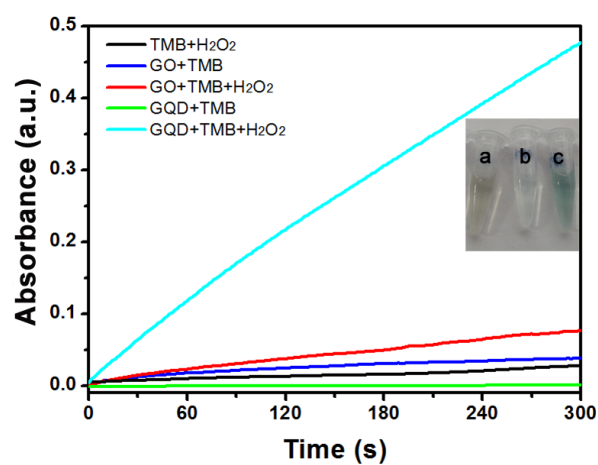

**Figure S1.** The time-dependent absorbance changes at 652 nm in different reaction systems. Inset was the typical photographs of different solutions, (a) GQDs + TMB; (b) TMB+ H<sub>2</sub>O<sub>2</sub>; (c) GQDs +TMB+ H<sub>2</sub>O<sub>2</sub> in 0.1 M, pH 3.5 NaAc buffer.

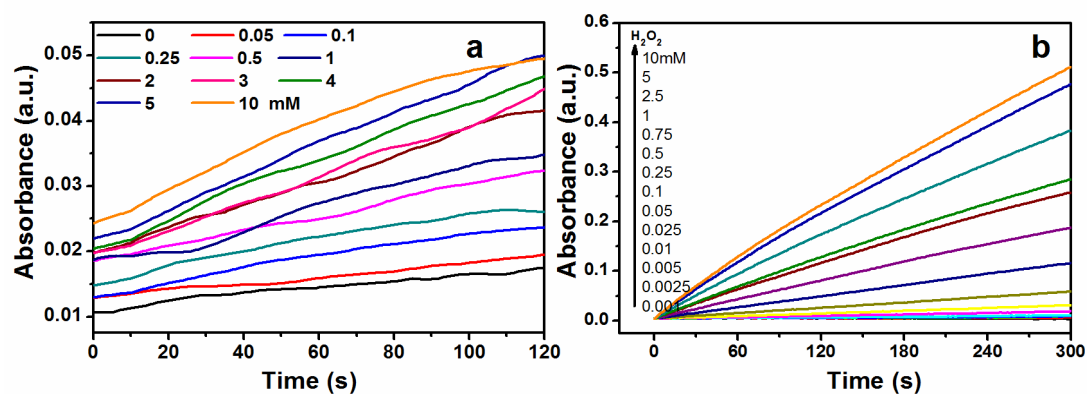

**Figure S2.** The time-dependent absorbance changes of the reaction mixture of GO +TMB+ $H_2O_2$  (a) and GQDs +TMB+ $H_2O_2$ (b) at 652 nm under varying concentrations of  $H_2O_2$  using 40  $\mu$ g GO and 40  $\mu$ g GQDs as catalysts.

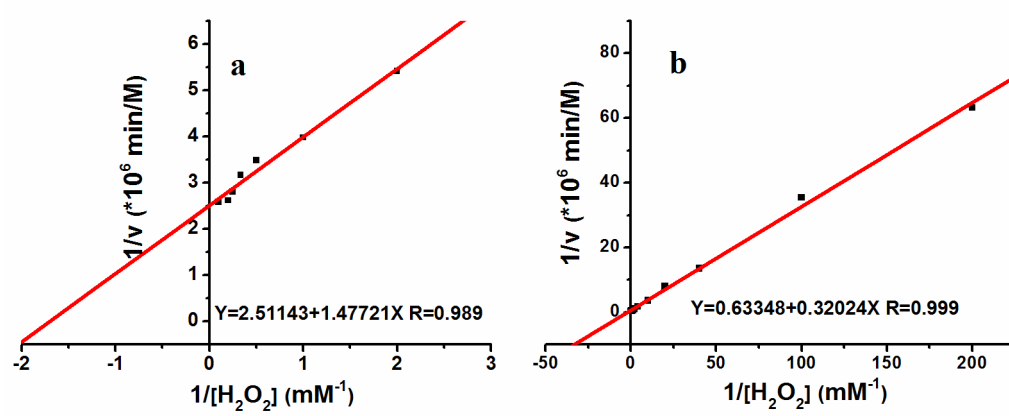

**Figure S3.** The double reciprocal plots of the initial reaction rates of TMB + H<sub>2</sub>O<sub>2</sub> with GO (a) and GQDs (b) versus H<sub>2</sub>O<sub>2</sub> concentration.

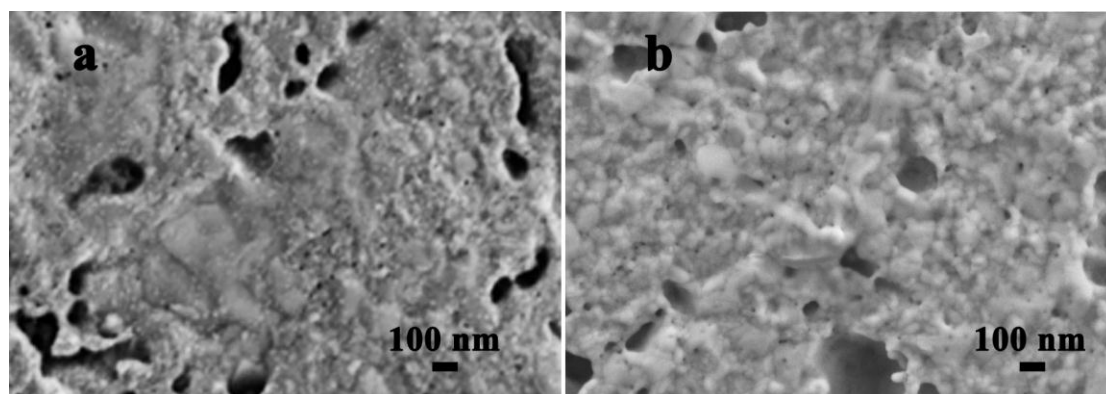

**Figure S4.** SEM images of the GQDs/Au (a) and GO/Au (b) electrodes that stored for more than 30 days at room temperature ( $\sim 20^{\circ}\text{C}$ )

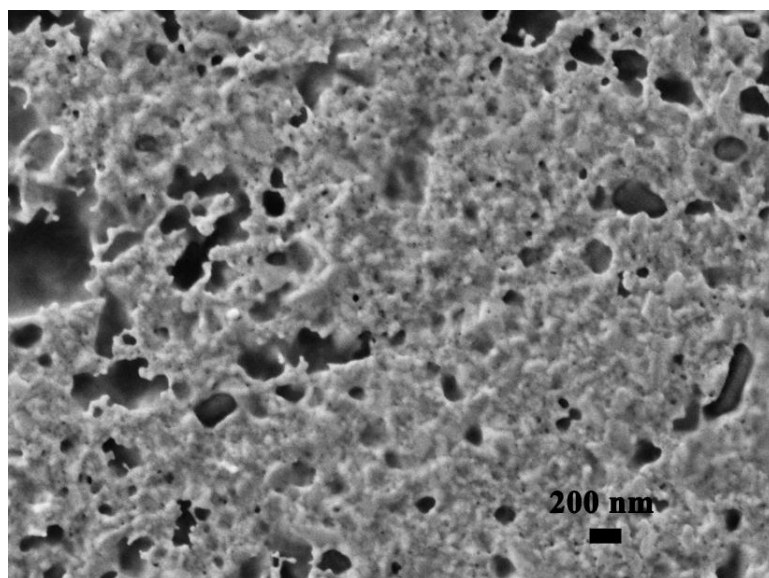

**Figure S5.** SEM image of the GQDs modified Au electrode through casting method.



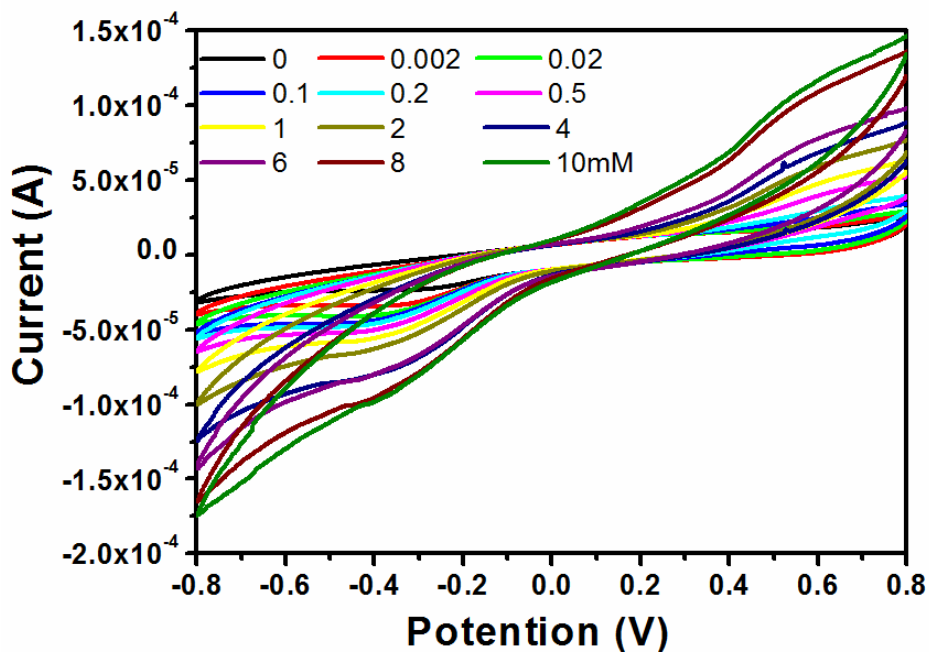

**Figure S6.** CVs of the GQDs/Au electrode in phosphate buffer (0.01 M, pH 7) with successive addition of  $\text{H}_2\text{O}_2$  at 50 mV/s.

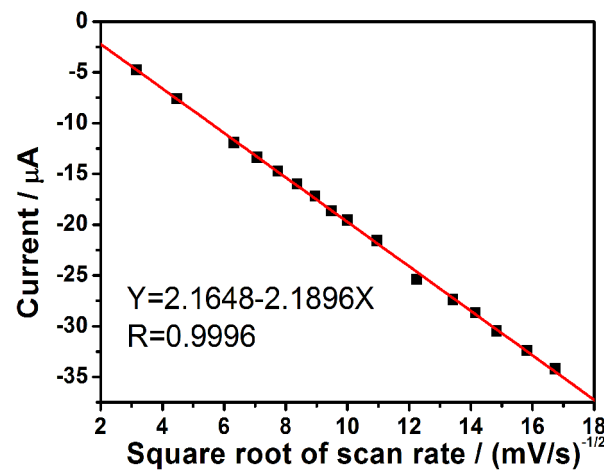

**Figure S7.** The peak current intensity, which was obtained from cyclic voltammograms of the GQDs/Au electrodes in PBS (0.01 M, pH 7) buffer at different scan rates increases linearly with the square root of scan rate.

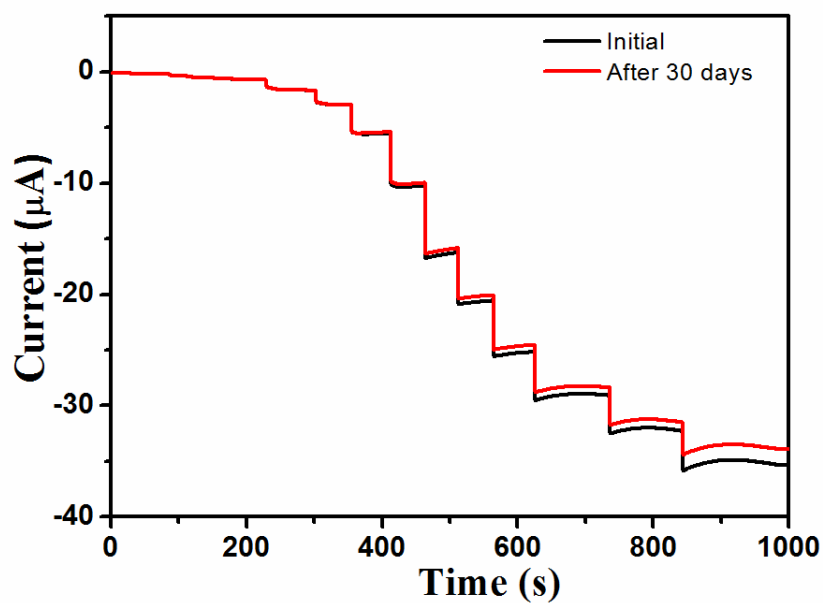

**Figure S8.** Comparison of the amperometric responses of the GQDs/Au electrodes that fresh prepared and stored 30 days to successive addition of H<sub>2</sub>O<sub>2</sub> at -0.4 V vs. SCE in PBS (0.01 M, pH 7) buffer.

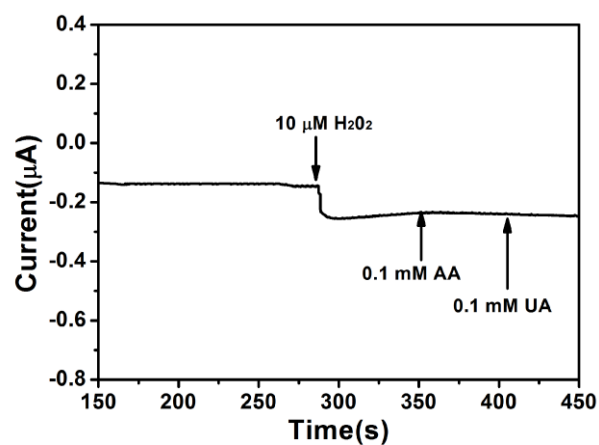

**Figure S9.** Amperometric responses of the GQDs/Au electrode to the addition of H<sub>2</sub>O<sub>2</sub>, L-ascorbic acid (AA) and uric acid (UA) at an applied potential of - 0.4 V.

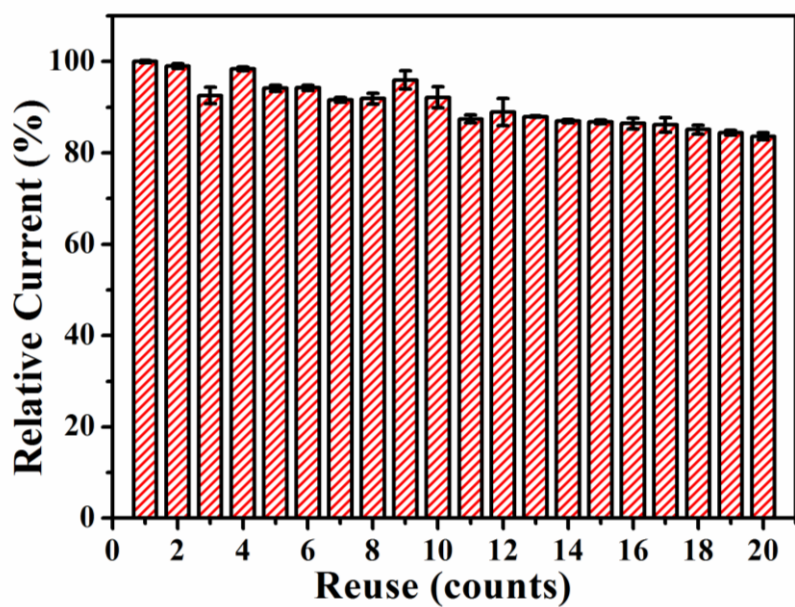

**Figure S10.** Reuse of the GQDs/Au electrode in PBS (0.01 M, pH 7).
